# Supplementary material
Source: Springer Nature journal article supplement (https://www.springermedizin.de/resource/supplementary/13014_2010_529_MOESM11_ESM.pdf/9633640)

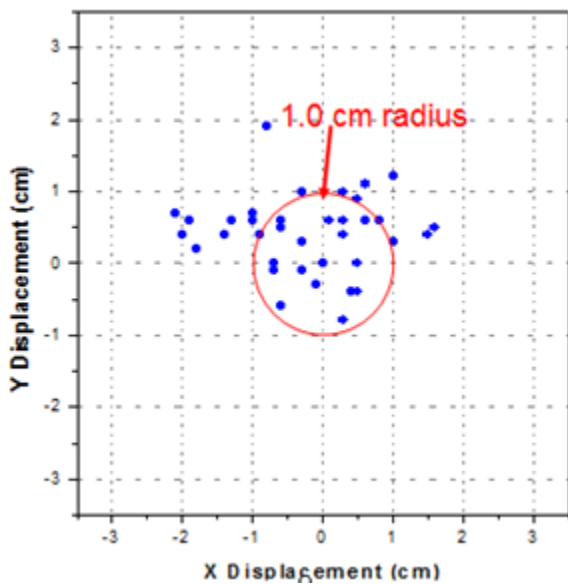

A.

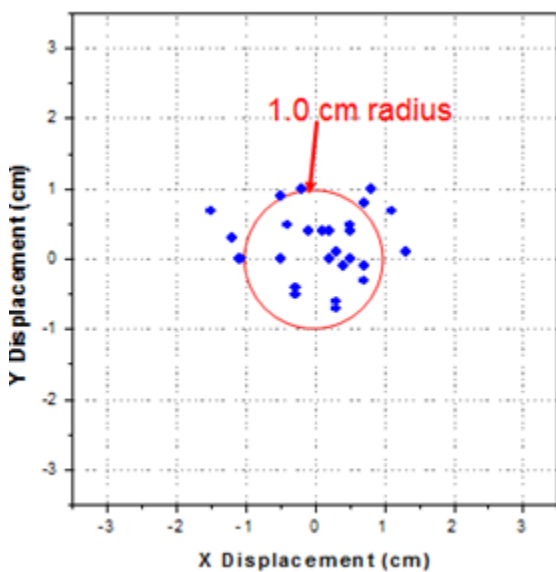

B

Supplement: MOESM11 [file 9633640]
